# Supplementary material for: Sol–gel synthesis of hierarchically porous TiO2 beads using calcium alginate beads as sacrificial templates
Source: Royal Society of Chemistry journal article supplement (doi:10.1039/c2jm15720a), 2012-01-01
Supplement: c2jm15720a.pdf [file c2jm15720a.pdf]

# Supporting Information

## Sol-gel synthesis of hierarchically porous TiO<sub>2</sub> beads using calcium alginate beads as sacrificial templates

Maryline Chee Kimling<sup>a</sup> and Rachel A. Caruso<sup>\*ab</sup>

<sup>a</sup>Particulate Fluids Processing Centre, School of Chemistry, The University of Melbourne, Melbourne, Victoria 3010, Australia

<sup>b</sup>CSIRO, Materials Science and Engineering, Private Bag 33, Clayton South, Victoria 3169, Australia

\* To whom correspondence should be addressed.

E-mail: [rcaruso@unimelb.edu.au](mailto:rcaruso@unimelb.edu.au)

**Surface Hydroxyl Group (OH) Determination.** Thermogravimetric testing was conducted on calcined TiO<sub>2</sub> beads to determine OH content using a procedure developed by Mueller *et al.*<sup>1</sup> The heating profile was set as follows under a nitrogen atmosphere: the materials were stabilized at 25 °C for 5 min before being subjected to a heating ramp of 10 °C min<sup>-1</sup> to 120 °C before further stabilization at that temperature for 30 min. The materials were then heated to 500 °C with a heating ramp of 20 °C min<sup>-1</sup>. The surface hydroxyl group density was calculated based on the weight loss (g) between 120 °C and 500 °C using Equation S1 as follows:

$$OHnm^{-2} = \alpha \left( \frac{wt_{T_1} - wt_{T_2}}{wt_{T_1}} \right) \frac{2N_A}{SA_{BET} \times Mw_{H_2O}} \quad (S1)$$

where  $\alpha$  is a calibration factor with the value 0.625,  $T_1=120$  °C and  $T_2=500$  °C,  $N_A$  is Avogadro's number and  $SA_{BET}$  is the BET surface area in nm<sup>2</sup> g<sup>-1</sup> and  $Mw_{H_2O}$  is the molecular weight of water. Also,

$$OHg^{-1} = OHnm^{-2} \times SA_{BET} \quad (S2)$$

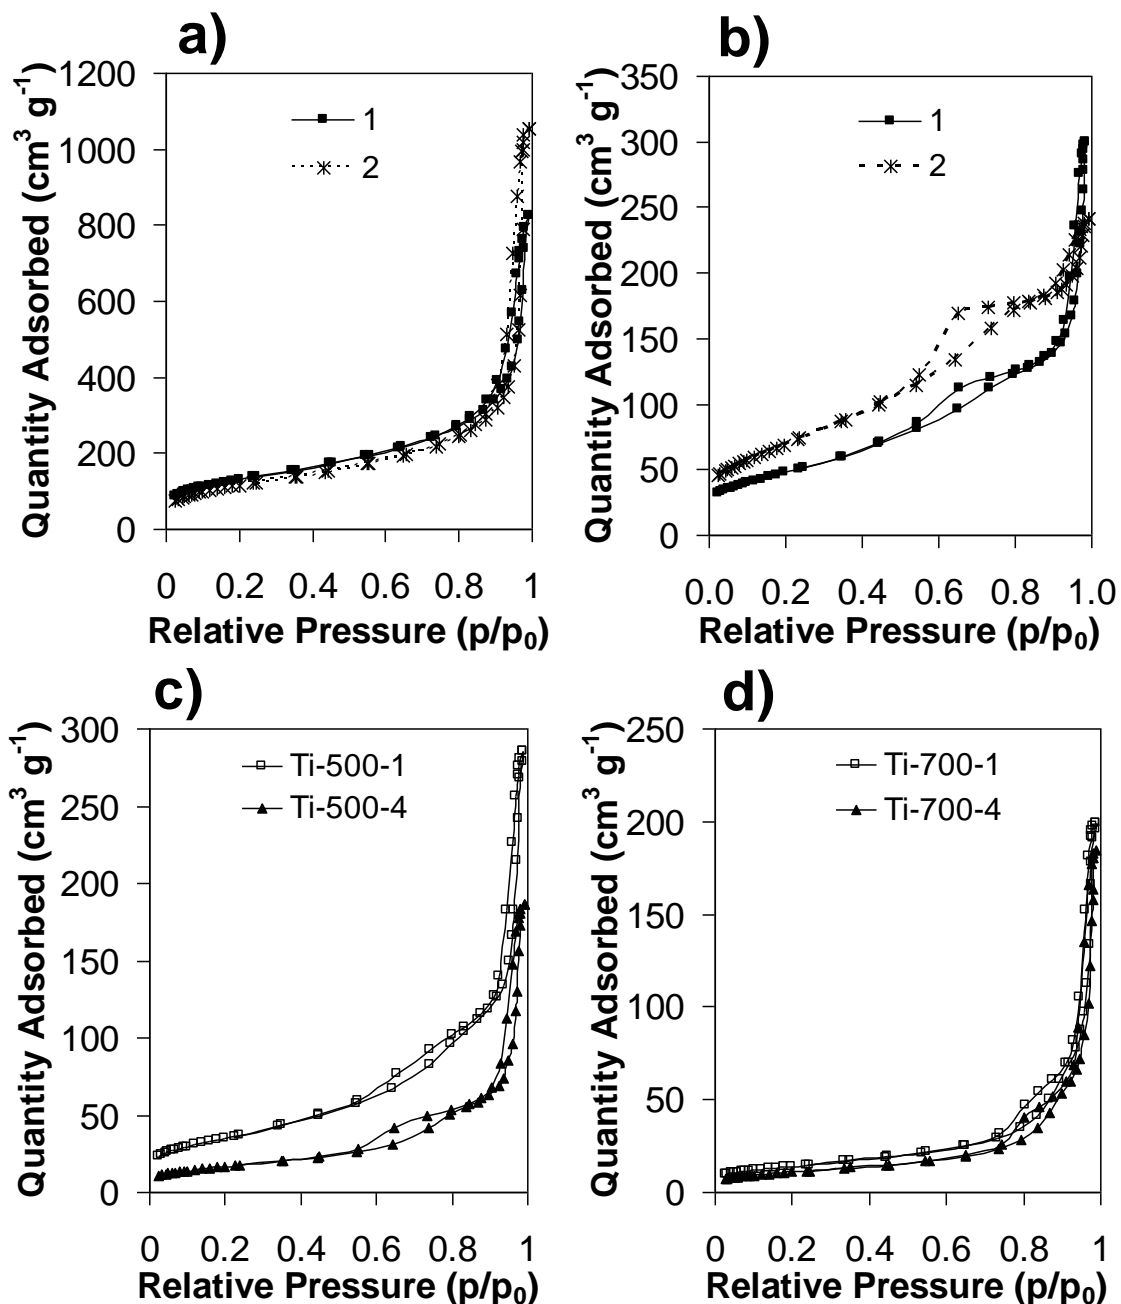

**Figure S1.** N<sub>2</sub> sorption isotherms of (a) critical point dried CaAlg template beads prepared using (1) 1 wt% or (2) 2 wt% NaAlg solution, a 0.27 M Ca<sup>2+</sup> bath and a curing time of 2 h and (b) TiO<sub>2</sub> beads prepared using CaAlg beads synthesized from (1) 1 wt% or (2) 2 wt% NaAlg solution, a 0.27 M Ca<sup>2+</sup> bath and a curing time of 2 h. The templated beads were calcined at 450 °C. Nitrogen sorption isotherms of the TiO<sub>2</sub> beads originally calcined at (c) 500 °C and (d) 700 °C, and functionalized with 0 wt% (Ti-500-1 and Ti-700-1) or 1 wt% (Ti-500-4 and Ti-700-4) Alen. The CaAlg template beads employed for this study were produced from 1 wt% NaAlg, a 0.27 M Ca<sup>2+</sup> bath and cured for 24 h. Isotherms have *not* been offset.

All sorption isotherms were of Type IV, indicative of the presence of a mesoporous structure and featured two hysteresis loops that can be associated with the presence of small mesopores and meso-macropores, at lower and higher relative pressures, respectively.

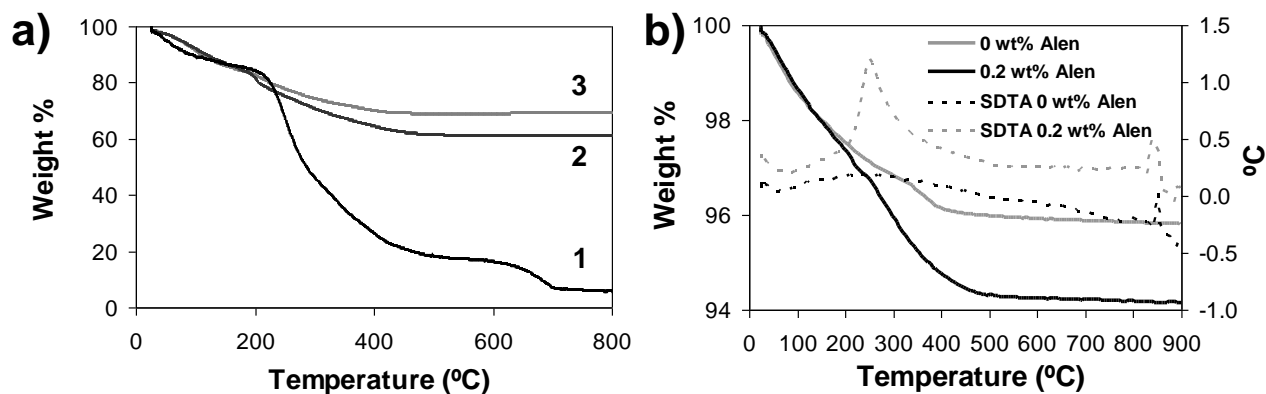

**Figure S2.** (a) Thermograms of (1) critical point dried CaAlg template beads prepared using 1 wt% NaAlg solution, a 0.27 M  $\text{Ca}^{2+}$  bath and cured for 2 h. Hybrid alginate/ $\text{TiO}_2$  beads prepared using CaAlg template beads prepared from (2) 2 wt% or (3) 1 wt% NaAlg solution, 0.27 M  $\text{Ca}^{2+}$  bath with a curing time of 2 h. (b) Thermograms of Ti-500 beads loaded with 0 and 0.2 wt% Alen at pH 2.01. CaAlg template beads used were produced from 1 wt% NaAlg solution, 0.27 M  $\text{Ca}^{2+}$  and cured for 24 h. Solid lines represent thermogravimetric profiles related to the mass loss in percentage (Left axis, Weight %) whereas dashed lines represent single differential temperature profiles (SDTA) (Right axis,  $^{\circ}\text{C}$ ). Beads were subjected to a linear heating ramp of  $10\text{ }^{\circ}\text{C min}^{-1}$  under an oxygen atmosphere.

Figure S2b shows the results obtained when Ti-500 beads were heated following functionalization with Alen at 0 and 0.2 wt% (pH 2.01). Alen loaded  $\text{TiO}_2$  samples showed a distinct exothermic peak at  $\sim 250\text{ }^{\circ}\text{C}$ . The exothermic peak occurring at  $\sim 850\text{ }^{\circ}\text{C}$  (with no mass loss) was likely due to further crystallization occurring within the metal oxide, whereas the endothermic process occurring at  $\sim 100\text{ }^{\circ}\text{C}$  was due to the evaporation of physisorbed water. Hence the temperature range ( $120\text{--}800\text{ }^{\circ}\text{C}$ ) was used to assess the mass loss attributed to Alen loading.

**Table S1.** Atomic percent composition of  $\text{TiO}_2$  beads prepared using varying CaAlg template beads prepared from 1 or 2 wt% NaAlg and 0.14, 0.27 or 0.42 M  $\text{Ca}^{2+}$  and a curing time of 2 h.

| NaAlg - $\text{Ca}^{2+}$ (wt% - M) | Atomic Percent (%) <sup>a</sup> |       |      |
|------------------------------------|---------------------------------|-------|------|
|                                    | Ti                              | O     | Ca   |
| 1- 0.14                            | 30.28                           | 67.90 | 1.82 |
| 1- 0.27                            | 32.14                           | 65.79 | 2.07 |
| 1- 0.42                            | 36.22                           | 60.31 | 3.48 |
| 2- 0.14                            | 33.31                           | 63.80 | 2.89 |
| 2- 0.27                            | 37.25                           | 59.48 | 3.27 |
| 2- 0.42                            | 33.22                           | 61.79 | 4.99 |

<sup>a</sup>Values obtained are indicative only; as obtained from EDX analysis of the central region of the beads.

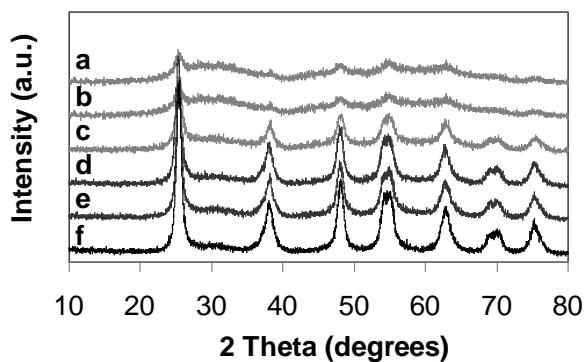

**Figure S3.** XRD patterns of TiO<sub>2</sub> beads calcined at 450 °C. The CaAlg template beads used were prepared using 2 wt% NaAlg solution and (a) 0.42 M, (b) 0.27 M or (c) 0.14 M Ca<sup>2+</sup> or 1 wt% NaAlg solution and (d) 0.42 M, (e) 0.27 M or (f) 0.14 M Ca<sup>2+</sup> with a curing time of 2 h. Patterns have each been shifted upwards by 200 a.u.

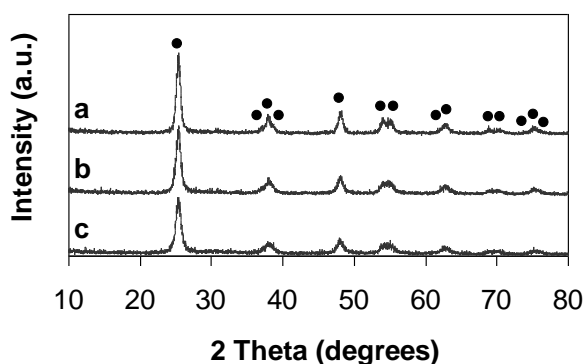

**Figure S4.** XRD patterns of TiO<sub>2</sub> beads calcined at (a) 500 °C, (b) 600 °C or (c) 700 °C. The CaAlg template beads employed were produced using 1 wt% NaAlg solution and 0.27 M Ca<sup>2+</sup> with a curing time of 24 h. Dots represent anatase reflection peaks. Patterns have each been shifted upwards by 200 a.u.

1 R. Mueller, H. K. Kammler, K. Wegner and S. E. Pratsinis, *Langmuir*, 2003, **19**, 160.
